# Supplementary material for: Coating of gallium-based liquid metal particles with molybdenum oxide and oxysulfide for electronic band structure modulation
Source: Royal Society of Chemistry journal article supplement (doi:10.1039/d2nr06733a), 2023-01-01
Supplement: d2nr06733a1.pdf [file d2nr06733a1.pdf]

## Supplementary Information

### **Coating of gallium-based liquid metal particles with molybdenum oxide and oxysulfide for electronic band structure modulation**

Mohammad B. Ghasemian,<sup>\*ab</sup> Yifang Wang,<sup>b</sup> Francois-Marie Allieux,<sup>ab</sup> Ali Zavabeti<sup>cd</sup> and Kourosh Kalantar-Zadeh<sup>\*ab</sup>

<sup>a</sup> School of Chemical and Biomolecular Engineering, University of Sydney, Sydney, NSW, Australia.

<sup>b</sup> School of Chemical Engineering, University of New South Wales (UNSW), Sydney, NSW, Australia.

<sup>c</sup> Department of Chemical Engineering, The University of Melbourne, Parkville, VIC, Australia.

<sup>d</sup> School of Science, RMIT University, Melbourne, VIC, Australia

E-mails: [m.ghasemian@unsw.edu.au](mailto:m.ghasemian@unsw.edu.au) and [k.kalantar-zadeh@unsw.edu.au](mailto:k.kalantar-zadeh@unsw.edu.au)

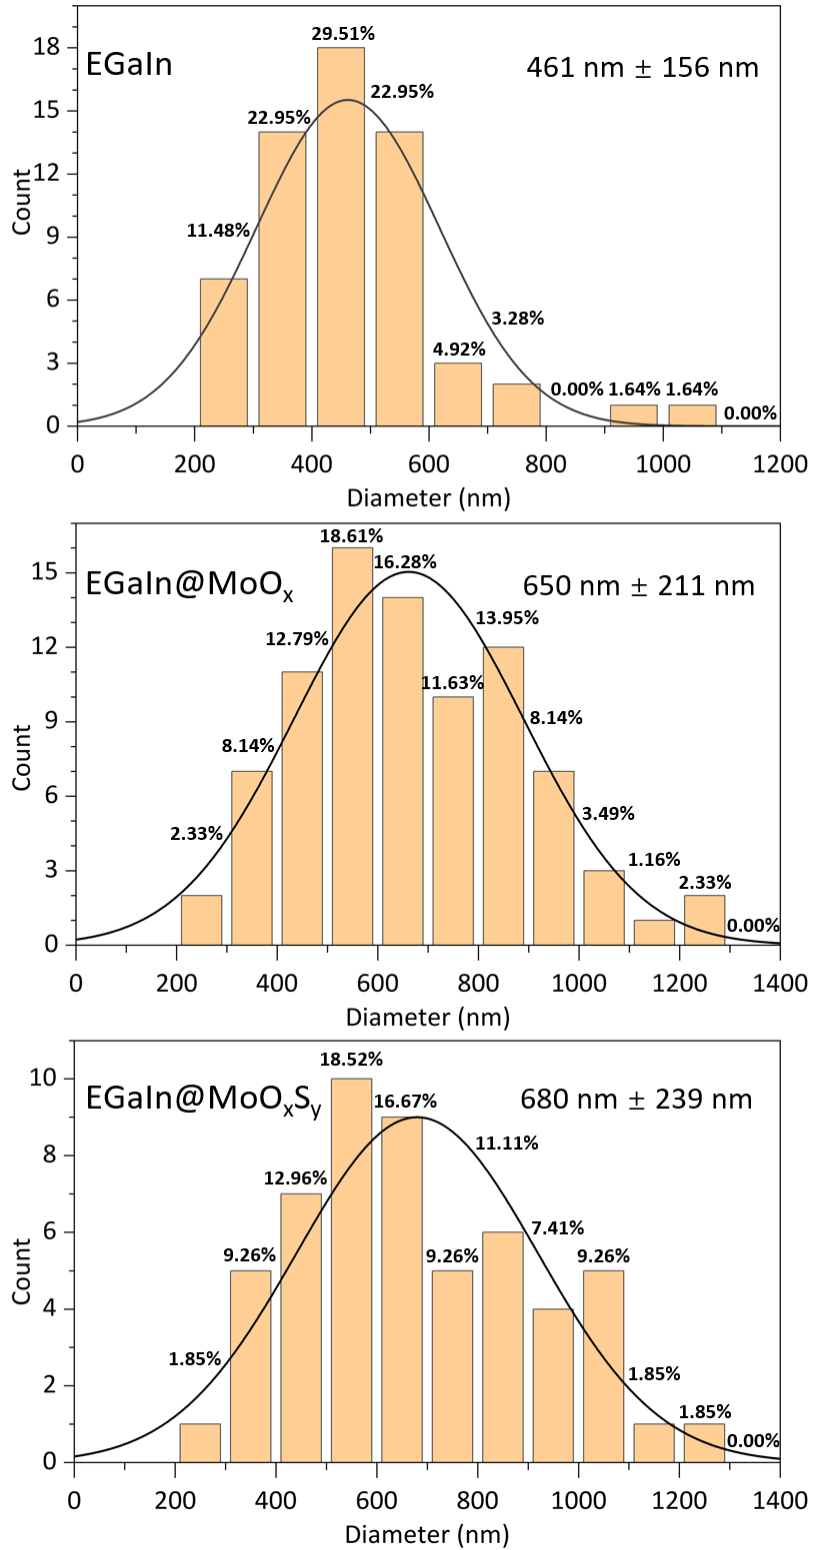

**Fig. S1.** Size distribution histograms for EGaIn (top), EGaIn@MoO<sub>x</sub> (middle), and EGaIn@MoO<sub>x</sub>S<sub>y</sub> (bottom). The percentage for each size range is marked on the top of each column. The mean and standard deviation values for each material are in the top right corner.

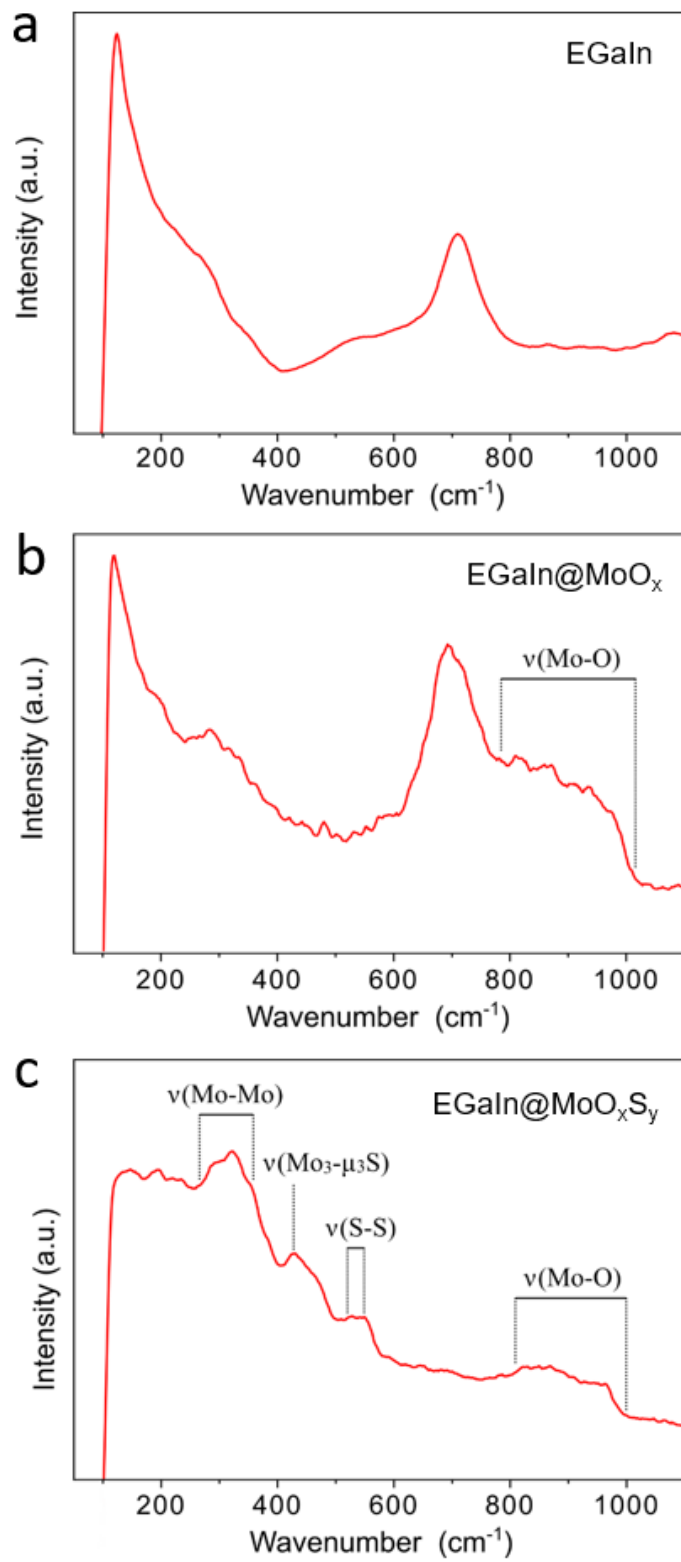

**Fig. S2.** Raman spectra of a) EGaIn, b) EGaIn@MoO<sub>x</sub>, and c) EGaIn@MoO<sub>x</sub>S<sub>y</sub> microparticles.
